# Supplementary material
Source: Springer Nature journal article supplement (https://www.springermedizin.de/resource/supplementary/12981_2006_68_MOESM6_ESM.pdf/9603756)

Ladder    plasmid    Empty    70.8    70.15    80.55    NT    Ladder

               -RT    +RT    -RT    +RT    -RT    +RT    -RT    +RT    -RT    +RT

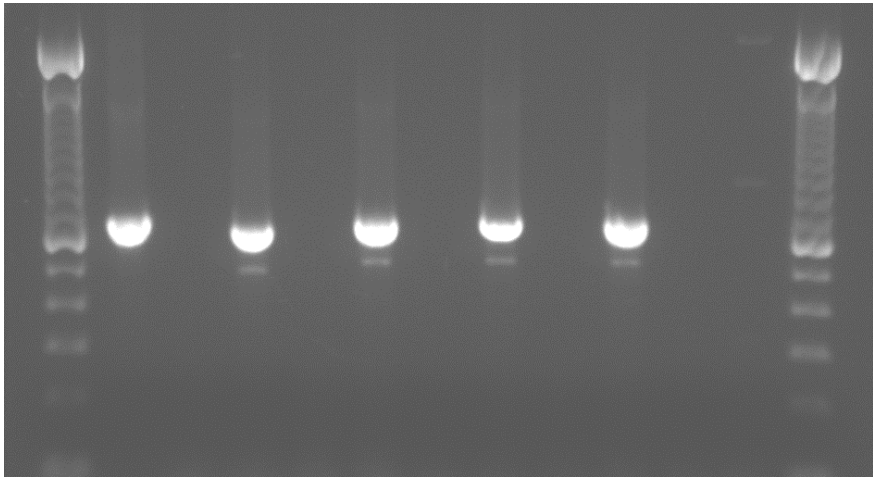

Supplement: MOESM6 [file 9603756]
